# Supplementary material
Source: PubMed Central journal article supplement (PMC4764039)
Supplement: supp_39.3.323v151649_DC151649SupplementaryData.pdf [file supp_39.3.323v151649_DC151649SupplementaryData.pdf]

## SUPPLEMENTARY DATA

### **Supplementary Table 1.**

*Eunice Kennedy Shriver* National Institute of Child Health and Human Development (NICHD)  
Obstetric and Pediatric Pharmacology and Therapeutics Branch (OPPTB)

Initiative to Advance Pediatric Therapeutics

Diabetes Working Group: William V. Tamborlane, M.D. (Chair) and Linda DiMeglio, M.D., M.P.H.  
(Vice-Chair)

### **Member Roster by Committee**

#### **Type 1 Diabetes: Therapeutics Committee**

Linda DiMeglio, M.D., M.P.H. (Chair)  
Riley Hospital for Children  
Indianapolis, IN

Robert P. Hoffman, M.D. (Co-Chair)  
Nationwide Children's Hospital  
Columbus, OH

Scott Blackman, M.D., Ph.D.  
Johns Hopkins Pediatric Specialty Clinic  
Baltimore, MD

Bruce Buckingham, M.D.  
Stanford University  
Los Gatos, CA

Carine de Beaufort, M.D., Ph.D.  
University of Luxembourg  
Luxembourg

Michael Freemark, M.D.  
Duke University Medical Center  
Durham, NC

Jon M. Nakamoto, M.D., Ph.D.  
Quest Diagnostics Nichols Institute  
San Juan Capistrano, CA

Aaron Kowalski, Ph.D.  
JDRF International  
New York, NY

## SUPPLEMENTARY DATA

Nelly Mauras, M.D.  
Nemours Children's Clinic, Jacksonville  
Jacksonville, FL

Kristen Nadeau, M.D., M.S.  
University of Colorado and Children's Hospital Colorado  
Aurora, CO

Janet Snell-Bergeon, M.P.H., Ph.D.  
University of Colorado  
Aurora, CO

Steven Willi, M.D.  
The Children's Hospital of Philadelphia  
Philadelphia, PA

### **Type 2 Diabetes: Therapeutics Committee**

William Tamborlane, M.D. (Chair)  
Yale University  
New Haven, CT

Georgeanna Klingensmith, M.D. (Co-Chair)  
Barbara Davis Center for Childhood Diabetes  
Aurora, CO

Kathleen Bethin, M.D., Ph.D.  
Women and Children's Hospital of Buffalo  
Buffalo, NY

Jeffrey Blumer, M.D.  
University of Toledo  
Toledo, OH

David Dunger  
University of Cambridge  
Cambridge, England  
United Kingdom

Rose Gubitosi-Klug, M.D., Ph.D.  
University Hospitals Rainbow Babies and Children's Hospital  
Cleveland, OH

Paula H. Hale, M.D.  
Novo Nordisk Inc.  
Princeton, NJ

## SUPPLEMENTARY DATA

Morey W. Haymond, M.D.  
Baylor College of Medicine  
Houston, TX

Janina Karres  
European Medicines Agency  
London, England

Lori Laffel, M.D., M.P.H.  
Joslin Clinic  
Boston, MA

Ingrid Libman, M.D., Ph.D.  
Children's Hospital of Pittsburgh  
Pittsburgh, PA

Ronald Portman, M.D.  
Novartis Pharmaceuticals Corporation  
East Hanover, NJ

Ravi Shankar, M.D.  
Merck & Co.  
Rahway, NJ

Paolo Tomasi, M.D., Ph.D.  
European Medicines Agency  
London, England

### **Type 1 Diabetes: Natural History and Biomarkers Committee**

Mark Rigby, M.D., Ph.D. (Chair)  
Janssen R&D  
Spring House, PA

Simi Ahmed, Ph.D.  
JDRF International  
New York, NY

Craig Beam, Ph.D.  
Western Michigan University  
Kalamazoo, MI

Kasia Bourcier, Ph.D.  
National Institutes of Health  
Bethesda, MD

## SUPPLEMENTARY DATA

Dana Dabelea, M.D., Ph.D.  
University of Colorado Denver  
Aurora, CO

Carine de Beaufort, M.D., Ph.D.  
University of Luxembourg  
Luxembourg

Mario Ehlers, M.D., Ph.D.  
Immune Tolerance Network  
San Francisco, CA

Stephen Gitelman, M.D.  
University of California, San Francisco  
San Francisco, CA

Peter Gottlieb, M.D.  
University of Colorado  
Aurora, CO

Carla Greenbaum, M.D.  
Benaroya Research Institute at Virginia Mason  
Seattle, WA

Kevan Herold, M.D.  
Yale University  
New Haven, CT

Violeta Iotova, M.D., Ph.D.  
University Hospital "St. Marina"  
Varna, Bulgaria

Rohit Kulkarni, M.D., Ph.D.  
Joslin Diabetes Center  
Boston, MA

Jeffrey Mahon, M.D.  
Lawson Health Research Institute  
London, ON  
Canada

Elizabeth Mayer-Davis, Ph.D.  
University of North Carolina  
Chapel Hill, NC

## SUPPLEMENTARY DATA

James McNamara, M.D.  
National Institutes of Health  
Bethesda, MD

Rama Natarajan, Ph.D.  
Beckman Research Institute  
City of Hope  
Duarte, CA

Trevor Orchard, M.D.  
University of Pittsburgh Medical Center  
Pittsburgh, PA

William Russell, M.D.  
Vanderbilt University School of Medicine  
Nashville, TN

Jay Sosenko, M.D.  
Diabetes Research Institute  
Miami, FL

Lisa Spain, Ph.D.  
National Institutes of Health  
Bethesda, MD

### **Type 2 Diabetes: Natural History and Biomarkers Committee**

Philip Zeitler, M.D., Ph.D. (Chair)  
Children's Hospital Colorado  
Aurora, CO

Fida Bacha, M.D. (Co-Chair)  
Texas Children's Hospital  
Houston, TX

Silva Arslanian, M.D.  
Children's Hospital of Pittsburgh  
Pittsburgh, PA

Sonia Caprio, M.D.  
Yale University School of Medicine  
New Haven, CT

Christine Chan, M.D.  
Children's Hospital Colorado  
Aurora, CO

## SUPPLEMENTARY DATA

Robert Chilton, M.D., D.O., F.A.C.C., F.A.H.A., F.A.C.P.  
University of Texas Health Science Center  
San Antonio, TX

Antonio Convit, M.D.  
New York University School of Medicine  
New York, NY

Agnes Gyurasics, M.D., Ph.D.  
National Institute for Quality- and Organizational Development in Healthcare and Medicines  
Budapest, Hungary

Tami Hannon, M.D.  
Indiana University School of Medicine  
Indianapolis, IN

Daniel Hsia, M.D.  
Pennington Biomedical Research Center  
Baton Rouge, LA

Megan Moriarty Kelsey, M.D., M.S.  
Children's Hospital Colorado  
Aurora, CO

Ingrid Libman, M.D., Ph.D.  
Children's Hospital of Pittsburgh  
Pittsburgh, PA

Jane Lynch, M.D.  
Texas Diabetes Institute  
San Antonio, TX

Zeina Melhem Nabhan, M.D.  
Indiana University  
Indianapolis, IN

Kristen Nadeau, M.D., M.S.  
University of Colorado and Children's Hospital Colorado  
Aurora, CO

Catherine Pihoker, M.D.  
Seattle Children's Hospital  
Seattle, WA

SUPPLEMENTARY DATA

**Diabetes Pharmacology Committee**

Michael Spigarelli, M.D., Ph.D. (Chair)  
University of Utah  
Salt Lake City, UT

Eda Cengiz, M.D., M.H.S. (Co-Chair)  
Yale University School of Medicine  
New Haven, CT

Jeffrey Barrett, Ph.D., F.C.P.  
Sanofi  
Bridgewater, NJ

Jeffrey Blumer, M.D.  
University of Toledo  
Toledo, OH

Jenny Chien, Ph.D.  
Eli Lilly & Company  
Indianapolis, IN

Dennis Dietzen, Ph.D., DABCC  
Washington University School of Medicine  
St. Louis Children's Hospital  
St. Louis, MO

Joga Gobburu, Ph.D., M.B.A.  
University of Maryland, Baltimore  
Baltimore, MD

Robert P. Hoffman, M.D.  
Nationwide Children's Hospital  
Columbus, OH

Holly Kimko, Ph.D.  
Janssen Research and Development, LLC of Johnson & Johnson  
Raritan, NJ

Tarek Leil, Ph.D.  
Bristol-Myers Squibb  
Princeton, NJ

Ingrid Libman, M.D., Ph.D.  
Children's Hospital of Pittsburgh  
Pittsburgh, PA

## SUPPLEMENTARY DATA

Jon M. Nakamoto, M.D., Ph.D  
Quest Diagnostics Nichols Institute  
San Juan Capistrano, CA

Michael Reed, Pharm.D.  
Akron Children's Hospital  
Akron, OH

Steven Russell, M.D., Ph.D.  
Massachusetts General Hospital MGH Diabetes Research Center  
Boston, MA

Paolo Tomasi, M.D., Ph.D.  
European Medicines Agency  
London, England
